# Supplementary material for: Costs of productivity loss due to occupational cancer in Canada: estimation using claims data from Workers’ Compensation Boards
Source: Springer Nature journal article supplement (doi:10.1186/s13561-017-0145-7), 2017-02-10
Supplement: MOESM1 [file 12059040]

## Appendix A1 – Previous studies of occupational cancer burden and/or cost

| Authors                      | Context                            | Data Sources                                                                                                                                                                                                         | Estimated Burden                                                                                                                                                           | Estimated Cost                                                                                                                                |
|------------------------------|------------------------------------|----------------------------------------------------------------------------------------------------------------------------------------------------------------------------------------------------------------------|----------------------------------------------------------------------------------------------------------------------------------------------------------------------------|-----------------------------------------------------------------------------------------------------------------------------------------------|
| Binazzi et al. (2013)        | Italy<br>2006                      | Italian National Institute of Statistics – mortality data (occupational cancer deaths)                                                                                                                               | 8000-8500 deaths per year from occupational cancer<br>170,000 potential years of life lost, and 16,000 potential years of working life lost                                | 360,000 Euro in indirect economic costs;<br>456,000 Euro in health care costs of occupational cancer.                                         |
| Del Bianco and Demers (2013) | Canada<br>1997 to 2010             | Association of WSBs of Canada, Canadian Cancer Society<br>Cancer Statistics                                                                                                                                          | Deaths from occupational cancer have increased in recent years, accepted claims increased particularly in Ontario                                                          | n/a                                                                                                                                           |
| Fritschi and Driscoll (2006) | Australia                          | Finnish estimates of proportion of cancers caused by occupation applied to Australian number of cancers. EU estimates of the proportion of workers exposed to carcinogens applied to Australian industrial profiles. | 5,000 invasive cancers<br>34,000 non-melanoma skin cancers caused by carcinogens each year.                                                                                | n/a                                                                                                                                           |
| Gomez et al. (2013)          | Spain<br>Basque county<br>2008     |                                                                                                                                                                                                                      | 1331 work-attributable cancers hospitalizations, 229 specialized ambulatory cases                                                                                          | > 10 million Euro<br>Public health system costs                                                                                               |
| Hopkins et al., 2010         | Canada<br>2009                     | Canadian Community Health Survey                                                                                                                                                                                     | Labour participation reduced by 36% (\$4518) in cancer patients and workable hours of care givers by 23% (\$2887)                                                          | Wage loss from cancer \$3.18 billion in 2009;<br>Includes loss to patients and caregivers;                                                    |
| Jardine et al. (2015)        |                                    | Not a peer-reviewed publication, but describes an interesting ongoing research program related to this.                                                                                                              |                                                                                                                                                                            |                                                                                                                                               |
| Labreche et al. (2016)       | Quebec,<br>Canada                  | Finland, UK, work-attributable fractions applied to Canadian Cancer Statistics                                                                                                                                       | 6% of cancer incidence attributable to work, avg. 2160 new cancer diagnoses, 1190 cancer deaths per year.                                                                  | n/a                                                                                                                                           |
| Lebeau et al. (2014)         | Quebec,<br>Canada,<br>2005 to 2007 | Quebec's Workers' Compensation Board (CSST)                                                                                                                                                                          | \$2.84 billion billion to human costs                                                                                                                                      | \$4.62 billion on average per year; average cost per case is \$38,355 (occupational injuries and diseases)                                    |
| Lee et al. (2012)            | Taiwan<br>1997-2005                | Taiwan Cancer Registry<br>National Mortality Registry                                                                                                                                                                | 51408 lung, 136 pleural mesothelioma, 12891 bladder, 5285 leukemia, 69720 in total new cases from 1997-2005, followed until 2007;<br>Expected years of life lost estimated | Lifetime healthcare expenditures (mean per person)<br>Us\$ 22359 lung<br>Us\$ 14900 mesothelioma<br>Us\$ 51987 bladder<br>Us\$ 59741 leukemia |
| Leigh et al. (2004)          | US, 1999                           | Workers Compensation Offices from 16 US states                                                                                                                                                                       | Cost shifting between workers compensation and private health care                                                                                                         | \$8 to \$23 billion in medical costs shifted from WCB to private individuals, insurance or state                                              |

|                       |                   |                                                                                                                                                           |                                                                                                                                                |                                                                                                                                                                                       |
|-----------------------|-------------------|-----------------------------------------------------------------------------------------------------------------------------------------------------------|------------------------------------------------------------------------------------------------------------------------------------------------|---------------------------------------------------------------------------------------------------------------------------------------------------------------------------------------|
| Leigh et al. (1997)   | U.S, 1992         | Bureau of Labour Statistics, National Council on Compensation Insurance, National Centre for Health Statistics, Health Care Financing Administration data | 6500 job-related deaths from injury, 13.2 million nonfatal injuries, 60300 deaths from disease, 862200 illnesses per year                      | \$65 billion in direct costs and \$106 billion in indirect cost = \$171 billion total costs<br>Injuries - \$145 billion<br>Illnesses - \$26 billion                                   |
| O'Neill               | UK                | Data sources and methods not clear                                                                                                                        | 20000-40000 new cases of work-related cancer each year                                                                                         | Annual cost to the economy of 29.5 to 59 billion pounds                                                                                                                               |
| Orenstein et al. 2010 | Canada            |                                                                                                                                                           | 761 (217 to 786) new occupational cancers in Alberta every year, 2,700 (1520 to 5400) people living with cancer due to occupational exposures. | The direct cost to the medical system approx \$15,682,000 per year. Indirect costs—resulting from loss of economic resources and reduced productivity—approx \$64.1 million per year. |
| Rushton et al. 2010   | Britain           | Literature risk estimates<br>Carcinogen Exposure Database, UK Labour Force Survey, Census of Employment                                                   | Estimation of cancer cases attributable to occupation                                                                                          | No cost estimates                                                                                                                                                                     |
| Serrier et al. 2014   | France 2010       | Epidemiological data                                                                                                                                      | Reduction in labour force participation: 36% by patients, and 23% by care-givers.                                                              | Social costs between 917 and 2181 million Euro. Including Indirect costs between 119 and 229 million Euro.                                                                            |
| Takala et al. (2014)  | Global, 2008-2011 | ILO, WHO, EU nations                                                                                                                                      | Globally, 2.3 million deaths due to occupational injuries and work related diseases                                                            | Estimated 1.6-6.0% of GDP go towards work-related injuries and communicable diseases.                                                                                                 |

## Appendix A2

The following injury/fatality claims were used in the estimations

- Asbestosis, and the following work-related cancers.
- Neoplasms, tumors, and cancer, uns.
- Malignant neoplasms and tumors (cancers, carcinomas, and sarcomas), uns.
- Malignant neoplasms and tumors of bone or connective tissue, uns.
- Bone, articular cartilage
- Connective and other soft tissue
- Malignant neoplasms and tumors of bone or connective tissue n.e.c.
- Malignant neoplasms and tumors of the skin, uns.
- Melanoma of the skin (melanocarcinoma)
- Non-melanoma skin cancer (squamous and basal cell)
- Multiple malignant neoplasms and tumors of the skin
- Malignant neoplasms and tumors of the skin, n.e.c.
- Malignant neoplasms and tumors of lymphatic and hematopoietic tissue, uns.
- Lymphosarcoma and reticulosarcoma (lymphoma, non-hodgkin's lymphoma)
- Hodgkin's disease
- Multiple myeloma
- Leukemias
- Malignant neoplasms and tumors of lymphatic and hematopoietic tissue, n.e.c.
- Malignant neoplasms and tumours of sites, n.e.c.
- Mesothelioma
- Benign neoplasms and tumors, uns.
- Benign neoplasms of bone, connective tissue, and skin, uns.
- Benign neoplasms of bone and articular cartilage
- Lipoma (fatty tumor)
- Other benign neoplasms of connective and other soft tissue
- Benign neoplasms and tumors of other sites, uns.
- Hemangioma and lymphangioma--any site
- Benign neoplasms and tumors of other sites, n.e.c.
- Neoplasms and tumors of unknown properties, uns.

**Appendix A3 – Determinants of Occupational Cancer Costs in Nova Scotia, estimates based on various inflation adjustment assumptions**

**Table A3-1 - Determinants of Occupational Cancer Costs in Nova Scotia – Cost Estimate 1**

|                                           | Unadjusted        | Adjusted Full Model | Adjusted Parsimonious Model |
|-------------------------------------------|-------------------|---------------------|-----------------------------|
| <i>Age at biopsy</i>                      |                   |                     |                             |
| <=50                                      | 1                 | 1                   | 1                           |
| 51-64                                     | 39.49%            | 11.17%              | 10.27%                      |
| 65+                                       | -52.79%           | <b>-70.61%**</b>    | <b>-69.87%**</b>            |
| <i>Industry</i>                           |                   |                     |                             |
| Government                                | 1                 | 1                   | 1                           |
| Construction                              | 186.48%           | 161.59%             | 143.98%                     |
| Manufacturing                             | 5.98%             | 11.68%              | 37.91%                      |
| Other                                     | <b>-63.33%*</b>   | -52.16%             | -58.13%                     |
| <i>Cancer type</i>                        |                   |                     |                             |
| Occupational                              | 1                 | 1                   | 1                           |
| Asbestos                                  | <b>321.10%***</b> | <b>798.54%***</b>   | <b>463.28%***</b>           |
| Firefighter                               | 59.49%            | 126.57%             | 85.11%                      |
| Missing                                   | 315.12%           | 433.83%             | 453.78%                     |
| <i>Injury type</i>                        |                   |                     |                             |
| Asbestosis                                | 1                 | 1                   |                             |
| Leukemias                                 | 47.81%            | 89.72%              |                             |
| Lymphosarcoma and Reticulosarcoma         | -59.00%           | -25.72%             |                             |
| Neoplasms and Tumors                      | -30.95%           | 8.69%               |                             |
| Mesothelioma                              | 60.24%            | 7.94%               |                             |
| Other                                     | 106.78%           | <b>304.31%**</b>    |                             |
| Unknown                                   | -28.27%           | 36.40%              |                             |
| <i>Region</i>                             |                   |                     |                             |
| Halifax, East Shore, West Hants           | 1                 | 1                   |                             |
| Annapolis Valley, South Shore, South West | 78.26%            | 18.2%               |                             |
| Colchester-East Hants, Cumberland, Pictou | -65.31%           | -21.79%             |                             |
| Cap Breton, Guysborough, Antigonish       | -34.99%           | 11.71%              |                             |
| Other                                     | -86.42%           | -87.59%             |                             |
| Missing                                   | <b>-68.54%***</b> | -48.86%             |                             |
| <i>Body part affected</i>                 |                   |                     |                             |
| Abdomen/Digestive                         | 1                 | 1                   |                             |
| Urinary System                            | 94.55%            | 104.66%             |                             |
| Body Systems                              | 143.42%           | 30.08%              |                             |
| Respiratory System                        | 20.38%            | -7.72%              |                             |
| Circulatory System                        | -20.08%           | -29.49%             |                             |
| Head and Neck                             | -68.99%           | -70.65%             |                             |
| Pelvic Region                             | -47.12%           | -30.02%             |                             |
| Other                                     | -46.45%           | -71.00%             |                             |
| Missing                                   | -25.77%           | -65.21%             |                             |

Unadjusted and adjusted linear regression models were log transformed. Values shown are exponentiated to estimate the geometric mean, expressed as a percentage of change in total cost compared to the referent. Total cost of claims were adjusted for inflation to 2014 from last year. Accident claims were reported. Estimates are adjusted for the Consumer Price Index for All Items. Inflation was determined using year to year biopsies.

\*\*\*p<0.01, \*\*p<0.05, \*p<0.1

N=304

Total cost: \$37,500,000

**Table A3-2 - Determinants of Occupational Cancer Costs in Nova Scotia – Cost Estimate 2**

|                                           | Unadjusted        | Adjusted Full Model | Adjusted Parsimonious Model |
|-------------------------------------------|-------------------|---------------------|-----------------------------|
| <i>Age at biopsy</i>                      |                   |                     |                             |
| <=50                                      | 1                 | 1                   | 1                           |
| 51-64                                     | 39.26%            | 10.85%              | 10.06%                      |
| 65+                                       | <b>-53.20%*</b>   | <b>-71.02%**</b>    | <b>-70.18%***</b>           |
| <i>Industry</i>                           |                   |                     |                             |
| Government                                | 1                 | 1                   | 1                           |
| Construction                              | 186.65%           | 165.33%             | 146.75%                     |
| Manufacturing                             | 4.75%             | 12.47%              | 38.38%                      |
| Other                                     | <b>-63.70%*</b>   | -51.90%             | -57.97%                     |
| <i>Cancer type</i>                        |                   |                     |                             |
| Occupational                              | 1                 | 1                   | 1                           |
| Asbestos                                  | <b>327.42%***</b> | <b>808.11%***</b>   | <b>472.93%***</b>           |
| Firefighter                               | 62.69%            | 130.94%             | 89.52%                      |
| Missing                                   | 317.16%           | 434.79%             | 455.83%                     |
| <i>Injury type</i>                        |                   |                     |                             |
| Asbestosis                                | 1                 | 1                   |                             |
| Leukemias                                 | 49.77%            | 89.17%              |                             |
| Lymphosarcoma and Reticulosarcoma         | -58.81%           | -26.85%             |                             |
| Neoplasms and Tumors                      | -31.35%           | 7.56%               |                             |
| Mesothelioma                              | 60.95%            | 7.02%               |                             |
| Other                                     | 102.34%           | <b>298.25%**</b>    |                             |
| Unknown                                   | -28.89%           | 34.35%              |                             |
| <i>Region</i>                             |                   |                     |                             |
| Halifax, East Shore, West Hants           | 1                 | 1                   |                             |
| Annapolis Valley, South Shore, South West | 79.46%            | 18.01%              |                             |
| Colchester-East Hants, Cumberland, Pictou | -65.74%           | -23.09%             |                             |
| Cape Breton, Guysborough, Antigonish      | -35.95%           | 10.54%              |                             |
| Other                                     | -86.60%           | -87.66%             |                             |
| Missing                                   | <b>-68.39%***</b> | -48.42%             |                             |
| <i>Body part affected</i>                 |                   |                     |                             |
| Abdomen/Digestive                         | 1                 | 1                   |                             |
| Urinary System                            | 95.48%            | 107.84%             |                             |
| Body Systems                              | 143.22%           | 29.91%              |                             |
| Respiratory System                        | 18.41%            | -8.32%              |                             |
| Circulatory System                        | -19.85%           | -29.31%             |                             |
| Head and Neck                             | -69.36%           | -70.59%             |                             |
| Pelvic Region                             | -47.38%           | -29.74%             |                             |
| Other                                     | -46.68%           | -71.08%             |                             |
| Missing                                   | -26.51%           | -65.29%             |                             |

Unadjusted and adjusted linear regression models were log transformed. Values shown are exponentiated to estimate the geometric mean, expressed as a percentage of change in total cost compared to the referent. Total cost of claims were adjusted for inflation to 2014 from last year accident claims were reported. Estimates are adjusted for the Consumer Price Index for Health and Personal Care. Inflation was determined using year of biopsy.

\*\*\*p<0.01, \*\*p<0.05, \*p<0.1

N=304

Total cost: \$36,800,000

**Table A3-3 - Determinants of Occupational Cancer Costs in Nova Scotia – Cost Estimate 3**

|                                           | Unadjusted        | Adjusted Full Model | Adjusted Parsimonious Model |
|-------------------------------------------|-------------------|---------------------|-----------------------------|
| <i>Age at biopsy</i>                      |                   |                     |                             |
| <=50                                      | 1                 | 1                   | 1                           |
| 51-64                                     | 3.23%             | 28.76%              | -21.87%                     |
| 65+                                       | <b>-67.39%*</b>   | <b>-81.85%***</b>   | <b>-79.94%***</b>           |
| <i>Industry</i>                           |                   |                     |                             |
| Government                                | 1                 | 1                   | 1                           |
| Construction                              | 174.81%           | 169.64%             | 160.67%                     |
| Manufacturing                             | 1.83%             | 5.62%               | 55.27%                      |
| Other                                     | <b>-71.70%*</b>   | -61.87%             | -65.210%                    |
| <i>Cancer type</i>                        |                   |                     |                             |
| Occupational                              | 1                 | 1                   | 1                           |
| Asbestos                                  | <b>348.60%***</b> | <b>1295.31%***</b>  | <b>535.98%***</b>           |
| Firefighter                               | 88.57%            | 159.37%             | 132.82%                     |
| Missing                                   | 524.07%           | 635.07%             | 776.79%                     |
| <i>Injury type</i>                        |                   |                     |                             |
| Asbestosis                                | 1                 | 1                   |                             |
| Leukemias                                 | 156.41%           | 386.91%             |                             |
| Lymphosarcoma and Reticulosarcoma         | -30.02%           | 104.62%             |                             |
| Neoplasms and Tumors                      | 7.62%             | 90.24%              |                             |
| Mesothelioma                              | 80.74%            | 14.37%              |                             |
| Other                                     | <b>218.52%*</b>   | <b>652.10%**</b>    |                             |
| Unknown                                   | -45.27%           | 78.10%              |                             |
| <i>Region</i>                             |                   |                     |                             |
| Halifax, East Shore, West Hants           | 1                 | 1                   |                             |
| Annapolis Valley, South Shore, South West | 112.23%           | 26.58%              |                             |
| Colchester-East Hants, Cumberland, Pictou | -58.98%           | -0.57%              |                             |
| Cape Breton, Guysborough, Antigonish      | -34.45%           | 18.45%              |                             |
| Other                                     | <b>-98.62%*</b>   | <b>-98.97%**</b>    |                             |
| Missing                                   | <b>-74.44%***</b> | -51.56%             |                             |
| <i>Body part affected</i>                 |                   |                     |                             |
| Abdomen/Digestive                         | 1                 | 1                   |                             |
| Urinary System                            | 127.23%           | 122.75%             |                             |
| Body Systems                              | 185.02%           | 25.83%              |                             |
| Respiratory System                        | 11.85%            | -4.41%              |                             |
| Circulatory System                        | -31.49%           | -53.36%             |                             |
| Head and Neck                             | -72.56%           | -74.68%             |                             |
| Pelvic Region                             | -37.46%           | -3.93%              |                             |
| Other                                     | -38.36%           | -69.34%             |                             |
| Missing                                   | -63.35%           | -81.08%             |                             |

Unadjusted and adjusted linear regression models were log transformed. Values shown are exponentiated to estimate the geometric mean, expressed as a percentage of change in total cost compared to the referent. Total cost of claims were adjusted for inflation to 2014 from first year accident claims were reported. Estimates are adjusted for the Consumer Price Index for All Items. Inflation was determined using year of biopsy.

\*\*\*p<0.01, \*\*p<0.05, \*p<0.1

N=304

Total Cost: \$43,100,000

**Table A3-4 - Determinants of Occupational Cancer Costs in Nova Scotia – Cost Estimate 4**

|                                           | Unadjusted        | Adjusted Full Model | Adjusted Parsimonious Model |
|-------------------------------------------|-------------------|---------------------|-----------------------------|
| <i>Age at biopsy</i>                      |                   |                     |                             |
| <=50                                      | 1                 | 1                   | 1                           |
| 51-64                                     | 3.82%             | -21.89%             | -21.38%                     |
| 65+                                       | <b>-67.22%*</b>   | <b>-81.82%***</b>   | <b>-79.87%***</b>           |
| <i>Industry</i>                           |                   |                     |                             |
| Government                                | 1                 | 1                   | 1                           |
| Construction                              | 175.05%           | 172.62%             | 163.16%                     |
| Manufacturing                             | 0.60%             | 6.10%               | 55.43%                      |
| Other                                     | <b>-71.840%*</b>  | -61.54%             | -64.88%                     |
| <i>Cancer type</i>                        |                   |                     |                             |
| Occupational                              | 1                 | 1                   | 1                           |
| Asbestos                                  | <b>356.86%***</b> | <b>1302.72%***</b>  | <b>547.73%***</b>           |
| Firefighter                               | 92.01%            | 143.83%             | 137.71%                     |
| Missing                                   | 514.91%           | 398.53%             | 762.10%                     |
| <i>Injury type</i>                        |                   |                     |                             |
| Asbestosis                                | 1                 | 1                   |                             |
| Leukemias                                 | 157.54%           | 348.75%             |                             |
| Lymphosarcoma and Reticulosarcoma         | -30.46%           | 98.30%              |                             |
| Neoplasms and Tumors                      | 5.78%             | 86.06%              |                             |
| Mesothelioma                              | 81.45%            | 13.37%              |                             |
| Other                                     | 208.14%           | <b>631.11%**</b>    |                             |
| Unknown                                   | -45.84%           | 74.47%              |                             |
| <i>Region</i>                             |                   |                     |                             |
| Halifax, East Shore, West Hants           | 1                 | 1                   |                             |
| Annapolis Valley, South Shore, South West | 113.93%           | 26.79%              |                             |
| Colchester-East Hants, Cumberland, Pictou | -59.54%           | -2.04%              |                             |
| Cape Breton, Guysborough, Antigonish      | -35.44%           | 17.62%              |                             |
| Other                                     | -98.60%           | <b>-98.94%**</b>    |                             |
| Missing                                   | <b>-74.17%***</b> | -51.07%             |                             |
| <i>Body part affected</i>                 |                   |                     |                             |
| Abdomen/Digestive                         | 1                 | 1                   |                             |
| Urinary System                            | 126.32%           | 124.41%             |                             |
| Body Systems                              | 185.59%           | 26.19%              |                             |
| Respiratory System                        | 10.05%            | -3.25%              |                             |
| Circulatory System                        | -31.23%           | -53.09%             |                             |
| Head and Neck                             | -73.04%           | -74.77%             |                             |
| Pelvic Region                             | -37.31%           | -3.31%              |                             |
| Other                                     | -38.44%           | -69.28%             |                             |
| Missing                                   | -63.48%           | -81.07%             |                             |

Unadjusted and adjusted linear regression models were log transformed. Values shown are exponentiated to estimate the geometric mean, expressed as a percentage of change in total cost compared to the referent. Total cost of claims were adjusted for inflation to 2014 from first year accident claims were reported. Estimates are adjusted for the Consumer Price Index for Health and Personal Care. Inflation was determined using year of biopsy.

\*\*\*p<0.01, \*\*p<0.05, \*p<0.1

N=304

Total cost: \$41,000,000

**Table A3-5 - Determinants of Occupational Cancer Costs in Nova Scotia – Cost Estimate 5**

|                                           | Unadjusted        | Adjusted Full Model | Adjusted Parsimonious Model |
|-------------------------------------------|-------------------|---------------------|-----------------------------|
| <i>Age at biopsy</i>                      |                   |                     |                             |
| <=50                                      | 1                 | 1                   | 1                           |
| 51-64                                     | 39.53%            | 11.36%              | 10.33%                      |
| 65+                                       | -52.73%           | <b>-70.47%**</b>    | <b>-69.80%**</b>            |
| <i>Industry</i>                           |                   |                     |                             |
| Government                                | 1                 | 1                   | 1                           |
| Construction                              | 187.00%           | 160.70%             | 143.22%                     |
| Manufacturing                             | 6.53%             | 11.40%              | 37.60%                      |
| Other                                     | <b>-63.12%*</b>   | -52.21%             | -58.18%                     |
| <i>Cancer type</i>                        |                   |                     |                             |
| Occupational                              | 1                 | 1                   | 1                           |
| Asbestos                                  | <b>317.66%***</b> | <b>793.34%***</b>   | <b>458.17%***</b>           |
| Firefighter                               | 57.98%            | 124.63%             | 83.02%                      |
| Missing                                   | 314.29%           | 432.87%             | 452.73%                     |
| <i>Injury type</i>                        |                   |                     |                             |
| Asbestosis                                | 1                 | 1                   |                             |
| Leukemias                                 | 47.15%            | 89.88%              |                             |
| Lymphosarcoma and Reticulosarcoma         | -59.16%           | -25.48%             |                             |
| Neoplasms and Tumors                      | -30.71%           | 9.23%               |                             |
| Mesothelioma                              | 59.57%            | 8.20%               |                             |
| Other                                     | 108.65%           | <b>306.86%**</b>    |                             |
| Unknown                                   | -27.88%           | 37.37%              |                             |
| <i>Region</i>                             |                   |                     |                             |
| Halifax, East Shore, West Hants           | 1                 | 1                   |                             |
| Annapolis Valley, South Shore, South West | 77.62%            | 18.03%              |                             |
| Colchester-East Hants, Cumberland, Pictou | -65.12%           | -21.35%             |                             |
| Cape Breton, Guysborough, Antigonish      | -34.63%           | 11.94%              |                             |
| Other                                     | -86.30%           | -87.53%             |                             |
| Missing                                   | <b>-68.66%***</b> | -49.12%             |                             |
| <i>Body part affected</i>                 |                   |                     |                             |
| Abdomen/Digestive                         | 1                 | 1                   |                             |
| Urinary System                            | 94.90%            | 104.01%             |                             |
| Body Systems                              | 143.59%           | 30.30%              |                             |
| Respiratory System                        | 21.28%            | -7.43%              |                             |
| Circulatory System                        | -20.07%           | -29.38%             |                             |
| Head and Neck                             | -68.74%           | -70.62%             |                             |
| Pelvic Region                             | -46.99%           | -30.09%             |                             |
| Other                                     | -46.34%           | -70.97%             |                             |
| Missing                                   | -25.38%           | -65.16%             |                             |

Unadjusted and adjusted linear regression models were log transformed. Values shown are exponentiated to estimate the geometric mean, expressed as a percentage of change in total cost compared to the referent. Total cost of claims were adjusted for inflation to 2014 from last year. Accident claims were reported. Estimates are adjusted for the national (1957-1978) and Nova Scotia (1979-2015) Consumer Price Index for All Items. Inflation was determined using year of biopsy.

\*\*\*p<0.01, \*\*p<0.05, \*p<0.1

N=304

Total cost: \$37,900,000



**Table A3-6 - Determinants of Occupational Cancer Costs in Nova Scotia – Cost Estimate 6**

|                                           | Unadjusted        | Adjusted Full Model | Adjusted Parsimonious Model |
|-------------------------------------------|-------------------|---------------------|-----------------------------|
| <i>Age at biopsy</i>                      |                   |                     |                             |
| <=50                                      | 1                 | 1                   | 1                           |
| 51-64                                     | 39.10%            | 10.55%              | 9.90%                       |
| 65+                                       | -53.41%           | <b>-71.27%**</b>    | <b>-70.36%**</b>            |
| <i>Industry</i>                           |                   |                     |                             |
| Government                                | 1                 | 1                   | 1                           |
| Construction                              | 186.05%           | 166.47%             | 147.37%                     |
| Manufacturing                             | 4.11%             | 12.76%              | 38.51%                      |
| Other                                     | <b>-63.91%*</b>   | -51.82%             | -57.95%                     |
| <i>Cancer type</i>                        |                   |                     |                             |
| Occupational                              | 1                 | 1                   | 1                           |
| Asbestos                                  | <b>331.10%***</b> | <b>812.39%***</b>   | <b>478.52%***</b>           |
| Firefighter                               | 64.39%            | 132.94%             | 91.67%                      |
| Missing                                   | 318.71%           | 435.59%             | 457.56%                     |
| <i>Injury type</i>                        |                   |                     |                             |
| Asbestosis                                | 1                 | 1                   |                             |
| Leukemias                                 | 50.77%            | 88.63%              |                             |
| Lymphosarcoma and Reticulosarcoma         | -58.67%           | -27.38%             |                             |
| Neoplasms and Tumors                      | -31.65%           | 6.81%               |                             |
| Mesothelioma                              | 61.49%            | 6.65%               |                             |
| Other                                     | 99.87%            | <b>294.72%**</b>    |                             |
| Unknown                                   | -29.46%           | 32.94%              |                             |
| <i>Region</i>                             |                   |                     |                             |
| Halifax, East Shore, West Hants           | 1                 | 1                   |                             |
| Annapolis Valley, South Shore, South West | 80.15%            | 18.09%              |                             |
| Colchester-East Hants, Cumberland, Pictou | -66.06%           | -23.88%             |                             |
| Cape Breton, Guysborough, Antigonish      | -36.49%           | 10.14%              |                             |
| Other                                     | -86.65%           | -87.66%             |                             |
| Missing                                   | <b>-68.29%***</b> | -48.17%             |                             |
| <i>Body part affected</i>                 |                   |                     |                             |
| Abdomen/Digestive                         | 1                 | 1                   |                             |
| Urinary System                            | 95.54%            | 109.01%             |                             |
| Body Systems                              | 143.56%           | 29.90%              |                             |
| Respiratory System                        | 17.45%            | -8.64%              |                             |
| Circulatory System                        | -19.64%           | -29.21%             |                             |
| Head and Neck                             | -69.66%           | -70.65%             |                             |
| Pelvic Region                             | -47.38%           | -29.46%             |                             |
| Other                                     | -46.70%           | -71.06%             |                             |
| Missing                                   | -27.03%           | -65.37%             |                             |

Unadjusted and adjusted linear regression models were log transformed. Values shown are exponentiated to estimate the geometric mean, expressed as a percentage of change in total cost compared to the referent. Total cost of claims were adjusted for inflation to 2014 from last year accidents were reported. Estimates are adjusted for the national (1957-1978) and Nova Scotia (1979-2015) Consumer Price Index for Health and Personal Care. Inflation was determined using year of biopsy.

\*\*\*p<0.01, \*\*p<0.05, \*p<0.1

N=304

Total Cost: \$36,500,000

**Table A3-7 - Determinants of Occupational Cancer Costs in Nova Scotia – Cost Estimate 7**

|                                           | Unadjusted        | Adjusted Full Model | Adjusted Parsimonious Model |
|-------------------------------------------|-------------------|---------------------|-----------------------------|
| <i>Age at biopsy</i>                      |                   |                     |                             |
| <=50                                      | 1                 | 1                   | 1                           |
| 51-64                                     | 2.94%             | -22.49%             | -22.07%                     |
| 65+                                       | <b>-67.52%*</b>   | <b>-81.86%***</b>   | <b>-80.00%***</b>           |
| <i>Industry</i>                           |                   |                     |                             |
| Government                                | 1                 | 1                   | 1                           |
| Construction                              | 175.94%           | 168.8%              | 160.23%                     |
| Manufacturing                             | 2.17%             | 5.06%               | 54.57%                      |
| Other                                     | <b>-71.62%*</b>   | -62.08%             | -65.40%                     |
| <i>Cancer type</i>                        |                   |                     |                             |
| Occupational                              | 1                 | 1                   | 1                           |
| Asbestos                                  | <b>344.95%***</b> | <b>1292.24%***</b>  | <b>530.47%***</b>           |
| Firefighter                               | 87.05%            | 157.10%             | 130.00%                     |
| Missing                                   | 530.28%           | 642.09%             | 786.05%                     |
| <i>Injury type</i>                        |                   |                     |                             |
| Asbestosis                                | 1                 | 1                   |                             |
| Leukemias                                 | 156.10%           | 389.59%             |                             |
| Lymphosarcoma and Reticulosarcoma         | -30.30%           | 105.88%             |                             |
| Neoplasms and Tumors                      | 8.30%             | 91.90%              |                             |
| Mesothelioma                              | 79.61%            | 14.49%              |                             |
| Other                                     | 221.65%           | <b>657.54%**</b>    |                             |
| Unknown                                   | -44.88%           | 79.91%              |                             |
| <i>Region</i>                             |                   |                     |                             |
| Halifax, East Shore, West Hants           | 1                 | 1                   |                             |
| Annapolis Valley, South Shore, South West | 111.74%           | 26.52%              |                             |
| Colchester-East Hants, Cumberland, Pictou | -58.77%           | 0.08%               |                             |
| Cape Breton, Guysborough, Antigonish      | -34.10%           | 19.03%              |                             |
| Other                                     | -98.63%           | <b>-98.98%**</b>    |                             |
| Missing                                   | <b>-74.67%***</b> | -51.91%             |                             |
| <i>Body part affected</i>                 |                   |                     |                             |
| Abdomen/Digestive                         | 1                 | 1                   |                             |
| Urinary System                            | 127.32%           | 121.22%             |                             |
| Body Systems                              | 185.39%           | 26.05%              |                             |
| Respiratory System                        | 12.63%            | 5.07%               |                             |
| Circulatory System                        | -31.63%           | -53.42%             |                             |
| Head and Neck                             | -72.35%           | -74.70%             |                             |
| Pelvic Region                             | -37.37%           | -4.02%              |                             |
| Other                                     | -38.34%           | -69.38%             |                             |
| Missing                                   | -63.16%           | -81.06%             |                             |

Unadjusted and adjusted linear regression models were log transformed. Values shown are exponentiated to estimate the geometric mean, expressed as a percentage of change in total cost compared to the referent. Total cost of claims were adjusted for inflation to 2014 from first year accident claims were reported. Estimates are adjusted for the national (1957-1978) and Nova Scotia (1979-2015) Consumer Price Index for All Items. Inflation was determined using year of biopsy.

\*\*\*p<0.01, \*\*p<0.05, \*p<0.1

N=304

Total cost: \$44,000,000
